# Supplementary material for: Outcome after acute ischemic stroke is linked to sex-specific lesion patterns
Source: PubMed Central journal article supplement (PMC8172535; doi:10.1038/s41467-021-23492-3), 2021-06-02
Supplement: 41467_2021_23492_MOESM3_ESM.pdf [file 41467_2021_23492_MOESM3_ESM.pdf]

## **Descriptions of Additional Supplementary Files**

### **Supplementary Data 1**

**Description:** Statistical comparisons of region-wise lesion loads and frequencies between men and women in the derivation cohort. Numbers in women and men were compared via two-sided t-tests (lesion loads) and two-sided Fisher's exact tests (frequencies). We here present resulting p-values, corrected for multiple comparisons.

### **Supplementary Data 2**

**Description:** Statistical comparisons of region-wise lesion loads and frequencies between the left in the derivation cohort. Numbers in the left versus right hemisphere were compared via two-sided t-tests (lesion loads) and two-sided Fisher's exact tests (frequencies). We here present resulting p-values, corrected for multiple comparisons.
